# Supplementary material for: Genome-Wide Identification, Characterization and Expression Analysis of the Chalcone Synthase Family in Maize
Source: PubMed Central journal article supplement (PMC4783895; doi:10.3390/ijms17020161), 2016-01-27
Supplement: ijms-17-00161-s001.pdf [file ijms-17-00161-s001.pdf]

# Supplementary Materials: Genome-Wide Identification, Characterization and Expression Analysis of the Chalcone Synthase Family in Maize

Yahui Han, Ting Ding, Bo Su and Haiyang Jiang

**Table S1.** The specific-primers for qPCR.

| ID | Gene Name        | Primer 5'→3'               |
|----|------------------|----------------------------|
| 1  | <i>ZmCHS01-F</i> | AGCACCTCACCGACCTCAAG       |
| 2  | <i>ZmCHS01-R</i> | ACGCTTCCGGATCATCGA         |
| 3  | <i>ZmCHS02-F</i> | TCACCGACCTCAAGGAGAAGTT     |
| 4  | <i>ZmCHS02-R</i> | TGTACCGCTTCCGGATCATC       |
| 5  | <i>ZmCHS03-F</i> | CTGGCCTCAAGGAAAAGTTCAA     |
| 6  | <i>ZmCHS03-R</i> | CCTCGGTGTGGTGCAGGTA        |
| 7  | <i>ZmCHS04-F</i> | GCGAGCACCTCACTAGCCTTA      |
| 8  | <i>ZmCHS04-R</i> | GTGGTGGAAGTAGCGTTTCTTGA    |
| 9  | <i>ZmCHS05-F</i> | AGAACCGGACTTCGAGATGCT      |
| 10 | <i>ZmCHS05-R</i> | CGGCGACCTGCTTGCT           |
| 11 | <i>ZmCHS06-F</i> | GCTGAGAGAGTACGGCAATATGAG   |
| 12 | <i>ZmCHS06-R</i> | CGTCAGTCGGCGGTGAAC         |
| 13 | <i>ZmCHS07-F</i> | CGTCGTCCCGCCATT            |
| 14 | <i>ZmCHS07-R</i> | CTGAGCAGCGGATCCTGTAA       |
| 15 | <i>ZmCHS08-F</i> | GCCGCCGTGAGGAAGAC          |
| 16 | <i>ZmCHS08-R</i> | GGCAGCATGCAGCACAATT        |
| 17 | <i>ZmCHS09-F</i> | CTGCGTTCAGCAAGACGAGTAC     |
| 18 | <i>ZmCHS09-R</i> | AGGTGGTCGCTGTTGGTGATA      |
| 19 | <i>ZmCHS10-F</i> | ATCATCTTACACACACGAAAGCAATC |
| 20 | <i>ZmCHS10-R</i> | GACTTGCAGGTATCGTTTTTTTACC  |
| 21 | <i>ZmCHS11-F</i> | GAAGTAAGTTGCTTTGCGATGGT    |
| 22 | <i>ZmCHS11-R</i> | GGCCTTGCCAGGGTTAGG         |
| 23 | <i>ZmCHS12-F</i> | CCGTCGAAGAACCGGACTT        |
| 24 | <i>ZmCHS12-R</i> | GTGCAACCCATCCTCACAGA       |
| 25 | <i>ZmCHS13-F</i> | CACAACAGTACAGCACTGGAAACA   |
| 26 | <i>ZmCHS13-R</i> | GCTGCCAGTGTCCGTCATT        |
| 27 | <i>ZmCHS14-F</i> | TATAGGAGCAGGTCCCATGACA     |
| 28 | <i>ZmCHS14-R</i> | GGAACCTCTGCGTGGAGAAC       |
